# Supplementary material for: COPS5 Conferred the Platinum Resistance in Epithelial Ovarian Cancer
Source: MDPI journal article supplement (doi:10.3390/cimb44090271), 2022-09-01
Supplement: s1 [file s1]

# Supplementary Materials

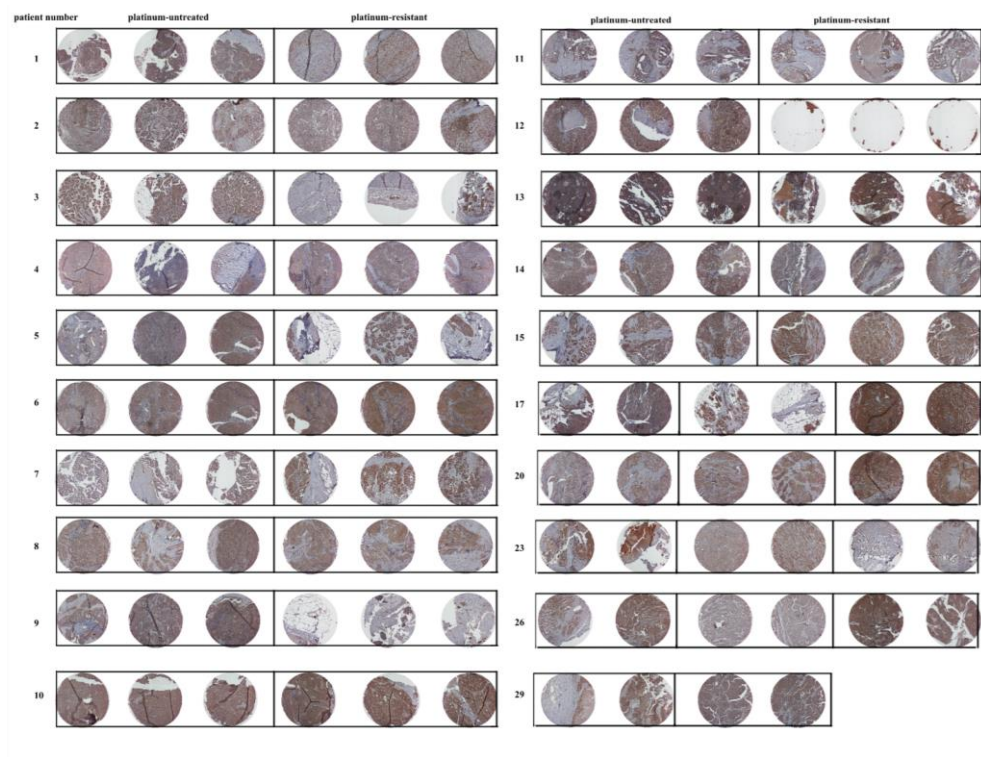

Figure S1. The IHC results of twenty pairs of EOC tissues.

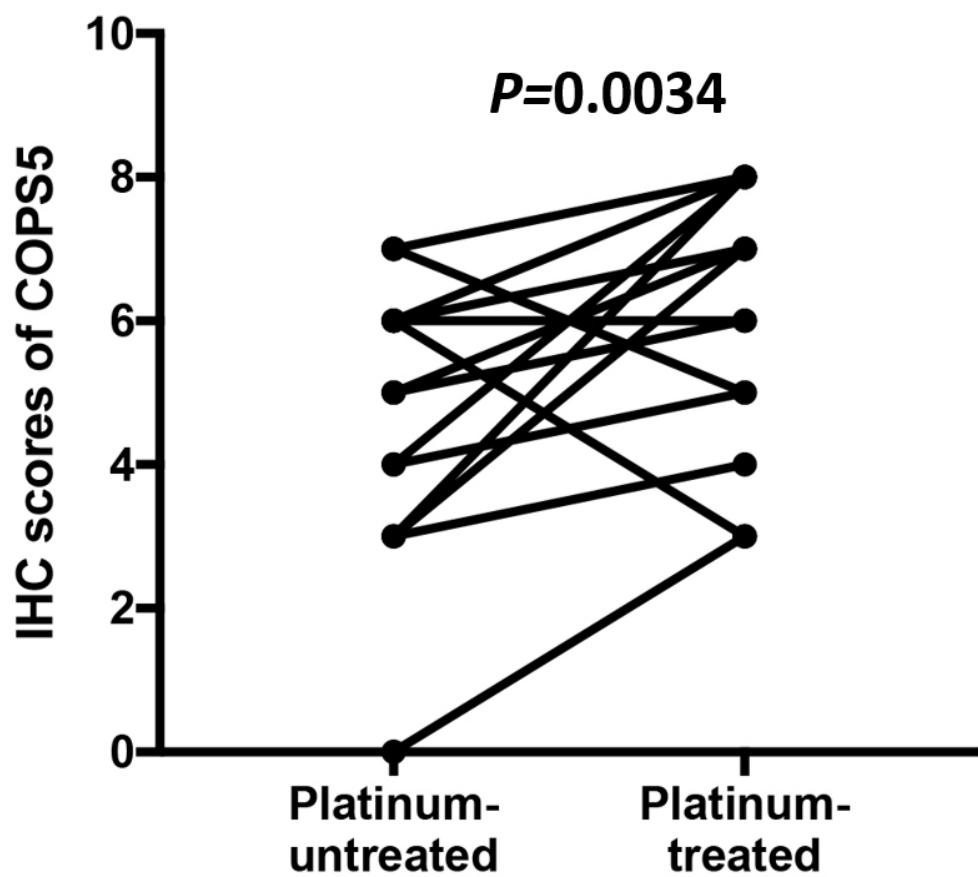

Figure S2. The statistical analysis of the EOC tissue samples according to the intensity of COPS5 staining.

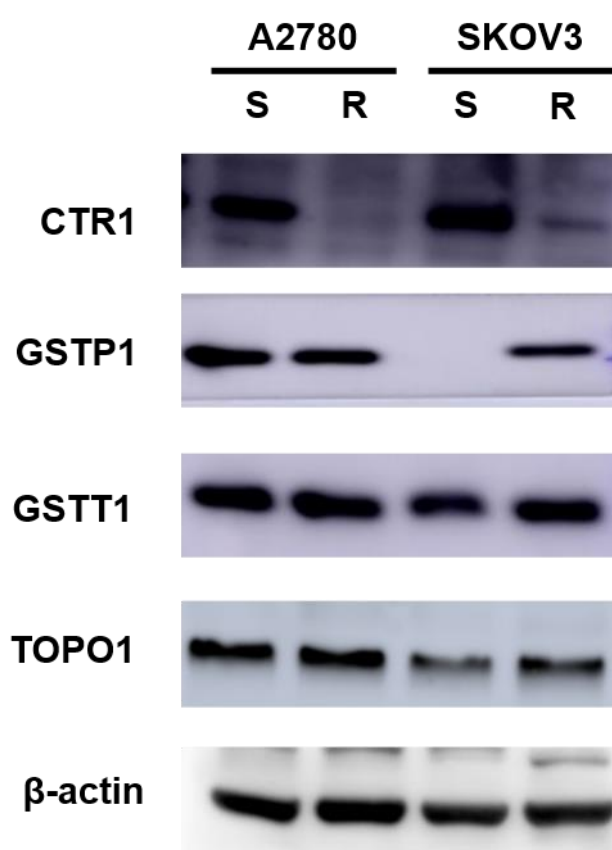

**Figure S3.** The expression of platinum-resistant related protein.
